# Supplementary material for: Sex Specific Effects of a High Fat Diet on Metabolism, Cognition, and Pathology in the Tg-SwDI Mouse Model of Alzheimer’s Disease
Source: Research Square preprint supplement (doi:10.21203/rs.3.rs-7686971/v1), 2025-10-10
Supplement: Supplementary file 1 [file a113d75c81eb52191a1a5b80.xlsx]

## Sheet: Sheet1
Main Effects		METABOLIC			BEHAVIOR
Source of Variation		Body Weight at GTT	% Visceral Fat	GTT AUC	Open Field - % Time in Corners	Open Field - Distance	NORT recognition index	Barnes Maze Probe - % Time in Target Cone	Barnes Maze Probe - % Errors
STRAIN	p value	0.2134	0.4043	0.5728	0.0572	0.4586	0.0009	0.0047	0.0231
	F (DFn, DFd)	F (1, 125) = 1.564	F (1, 119) = 0.7005	F (1, 123) = 0.3198	F (1, 124) = 3.686	F (1, 122) = 0.5528	F (1, 100) = 11.78	F (1, 122) = 8.304	F (1, 122) = 5.295
SEX	p value	<0.0001	<0.0001	0.0011	0.6683	0.3859	0.1533	0.1169	0.0075
	F (DFn, DFd)	F (1, 125) = 77.72	F (1, 119) = 97.15	F (1, 123) = 11.26	F (1, 124) = 0.1844	F (1, 122) = 0.7572	F (1, 100) = 2.071	F (1, 122) = 2.494	F (1, 122) = 7.390
DIET	p value	<0.0001	<0.0001	<0.0001	<0.0001	<0.0001	0.1246	0.0101	0.1006
	F (DFn, DFd)	F (1, 125) = 900.6	F (1, 119) = 173.9	F (1, 123) = 97.28	F (1, 124) = 17.13	F (1, 122) = 220.0	F (1, 100) = 2.398	F (1, 122) = 6.821	F (1, 122) = 2.737
STRAIN X SEX	p value	<0.0001	0.014	<0.0001	0.4057	<0.0001	0.2459	0.7293	0.1762
	F (DFn, DFd)	F (1, 125) = 19.05	F (1, 119) = 6.214	F (1, 123) = 28.10	F (1, 124) = 0.6962	F (1, 122) = 18.35	F (1, 100) = 1.362	F (1, 122) = 0.1204	F (1, 122) = 1.851
STRAIN X DIET	p value	0.0014	0.0123	0.6665	0.9377	0.0102	0.9248	0.7871	0.304
	F (DFn, DFd)	F (1, 125) = 10.66	F (1, 119) = 6.456	F (1, 123) = 0.1866	F (1, 124) = 0.006137	F (1, 122) = 6.808	F (1, 100) = 0.008948	F (1, 122) = 0.07325	F (1, 122) = 1.065
SEX X DIET	p value	<0.0001	<0.0001	<0.0001	0.4538	<0.0001	0.7762	0.3911	0.4852
	F (DFn, DFd)	F (1, 125) = 40.26	F (1, 119) = 114.5	F (1, 123) = 19.48	F (1, 124) = 0.5647	F (1, 122) = 61.02	F (1, 100) = 0.08124	F (1, 122) = 0.7407	F (1, 122) = 0.4902
STRAIN X SEX X DIET	p value	0.9012	0.0499	0.3384	0.4538	0.0088	0.6066	0.9641	0.8871
	F (DFn, DFd)	F (1, 125) = 0.01549	F (1, 119) = 3.924	F (1, 123) = 0.9237	F (1, 124) = 0.5647	F (1, 122) = 7.099	F (1, 100) = 0.2668	F (1, 122) = 0.002031	F (1, 122) = 0.02023
Main Effects		Iba1			Iba1 + CD68			GFAP
Source of Variation		CA1so - Iba1+ % Area	DGpo - Iba1+ % Area	VP thal - Iba1+ % Area	CA1so - Iba1+ and CD68+ % Area	DGpo - Iba1+ and CD68+ % Area	VP thal - Iba1+ and CD68+ % Area	CA1so - GFAP+ % Area	DGpo - GFAP+ % Area	VP thal - GFAP+ % Area
STRAIN	p value	<0.0001	<0.0001	<0.0001	<0.0001	<0.0001	<0.0001	<0.0001	<0.0001	<0.0001
	F (DFn, DFd)	F (1, 37) = 133.5	F (1, 37) = 241.0	F (1, 35) = 45.80	F (1, 37) = 94.02	F (1, 37) = 104.1	F (1, 35) = 30.58	F (1, 37) = 57.76	F (1, 37) = 28.27	F (1, 35) = 44.35
SEX	p value	0.8697	0.4799	0.5396	0.03	0.0552	0.6924	0.4738	0.975	0.8492
	F (DFn, DFd)	F (1, 37) = 0.02727	F (1, 37) = 0.5095	F (1, 35) = 0.3838	F (1, 37) = 5.095	F (1, 37) = 3.919	F (1, 35) = 0.1592	F (1, 37) = 0.5238	F (1, 37) = 0.0009948	F (1, 35) = 0.03669
DIET	p value	0.4762	0.0597	0.8349	0.2617	0.8637	0.4296	0.3192	0.9517	0.2681
	F (DFn, DFd)	F (1, 37) = 0.5181	F (1, 37) = 3.774	F (1, 35) = 0.04411	F (1, 37) = 1.299	F (1, 37) = 0.02986	F (1, 35) = 0.6385	F (1, 37) = 1.019	F (1, 37) = 0.003717	F (1, 35) = 1.267
STRAIN X SEX	p value	0.4571	0.2324	0.9251	0.0293	0.0566	0.8858	0.2105	0.5085	0.5971
	F (DFn, DFd)	F (1, 37) = 0.5646	F (1, 37) = 1.474	F (1, 35) = 0.008955	F (1, 37) = 5.141	F (1, 37) = 3.874	F (1, 35) = 0.02093	F (1, 37) = 1.624	F (1, 37) = 0.4457	F (1, 35) = 0.2845
STRAIN X DIET	p value	0.1344	0.0049	0.2233	0.2684	0.9033	0.3294	0.0607	0.3357	0.33
	F (DFn, DFd)	F (1, 37) = 2.342	F (1, 37) = 8.935	F (1, 35) = 1.537	F (1, 37) = 1.263	F (1, 37) = 0.01496	F (1, 35) = 0.9784	F (1, 37) = 3.744	F (1, 37) = 0.9512	F (1, 35) = 0.9758
SEX X DIET	p value	0.019	0.1181	0.0401	0.5892	0.2441	0.3075	0.1485	0.1314	0.3341
	F (DFn, DFd)	F (1, 37) = 6.015	F (1, 37) = 2.561	F (1, 35) = 4.547	F (1, 37) = 0.2967	F (1, 37) = 1.401	F (1, 35) = 1.072	F (1, 37) = 2.178	F (1, 37) = 2.380	F (1, 35) = 0.9594
STRAIN X SEX X DIET	p value	0.0293	0.2292	0.1267	0.5782	0.2355	0.3156	0.3493	0.6831	0.4256
	F (DFn, DFd)	F (1, 37) = 5.143	F (1, 37) = 1.495	F (1, 35) = 2.448	F (1, 37) = 0.3147	F (1, 37) = 1.454	F (1, 35) = 1.037	F (1, 37) = 0.8988	F (1, 37) = 0.1693	F (1, 35) = 0.6499
Main Effects		Amyloid			Lectin			CAA
Source of Variation		CA1so - Amyloid+ % Area	rspCTX - Amyloid+ % Area	VP thal - Amyloid+ % Area	CA1so - Lectin+ % Area	rspCTX - Lectin+ % Area	VP thal - Lectin+ % Area	CA1so - Amyloid + and Lectin+ % Area	rspCTX - Amyloid + and Lectin+ % Area	VP thal - Amyloid + and Lectin+ % Area
STRAIN	p value	0.0009	<0.0001	<0.0001	<0.0001	0.0013	<0.0001	0.0278	<0.0001	<0.0001
	F (DFn, DFd)	F (1, 39) = 13.01	F (1, 39) = 32.89	F (1, 39) = 58.84	F (1, 39) = 59.01	F (1, 39) = 12.03	F (1, 39) = 32.74	F (1, 39) = 5.221	F (1, 39) = 20.02	F (1, 39) = 46.70
SEX	p value	0.2462	0.5267	0.1053	0.4327	0.1591	0.8801	0.1892	0.9299	0.0765
	F (DFn, DFd)	F (1, 39) = 1.386	F (1, 39) = 0.4080	F (1, 39) = 2.750	F (1, 39) = 0.6286	F (1, 39) = 2.061	F (1, 39) = 0.02306	F (1, 39) = 1.786	F (1, 39) = 0.007843	F (1, 39) = 3.310
DIET	p value	0.8812	0.7925	0.0183	0.4918	0.8362	0.6127	0.751	0.7409	0.0073
	F (DFn, DFd)	F (1, 39) = 0.02264	F (1, 39) = 0.07017	F (1, 39) = 6.070	F (1, 39) = 0.4816	F (1, 39) = 0.04331	F (1, 39) = 0.2605	F (1, 39) = 0.1022	F (1, 39) = 0.1109	F (1, 39) = 8.029
STRAIN X SEX	p value	0.2667	0.5418	0.1493	0.3326	0.4776	0.3376	0.1889	0.9263	0.0882
	F (DFn, DFd)	F (1, 39) = 1.270	F (1, 39) = 0.3788	F (1, 39) = 2.164	F (1, 39) = 0.9625	F (1, 39) = 0.5142	F (1, 39) = 0.9427	F (1, 39) = 1.788	F (1, 39) = 0.008657	F (1, 39) = 3.058
STRAIN X DIET	p value	0.8643	0.7935	0.027	0.8992	0.8154	0.8263	0.7591	0.7371	0.0067
	F (DFn, DFd)	F (1, 39) = 0.02961	F (1, 39) = 0.06944	F (1, 39) = 5.281	F (1, 39) = 0.01626	F (1, 39) = 0.05522	F (1, 39) = 0.04883	F (1, 39) = 0.09539	F (1, 39) = 0.1143	F (1, 39) = 8.196
SEX X DIET	p value	0.9977	0.5637	0.0461	0.8545	0.8008	0.8887	0.9219	0.508	0.0762
	F (DFn, DFd)	F (1, 39) = 8.500e-006	F (1, 39) = 0.3391	F (1, 39) = 4.244	F (1, 39) = 0.03406	F (1, 39) = 0.06453	F (1, 39) = 0.01986	F (1, 39) = 0.009730	F (1, 39) = 0.4465	F (1, 39) = 3.319
STRAIN X SEX X DIET	p value	0.9804	0.5641	0.0389	0.9419	0.9829	0.5164	0.9244	0.5039	0.0719
	F (DFn, DFd)	F (1, 39) = 0.0006119	F (1, 39) = 0.3384	F (1, 39) = 4.566	F (1, 39) = 0.005386	F (1, 39) = 0.0004650	F (1, 39) = 0.4288	F (1, 39) = 0.009112	F (1, 39) = 0.4551	F (1, 39) = 3.423
